# Supplementary material for: A new synthesis strategy towards enhancing the structure and cycle stabilities of the LiNi0.80Co0.15Al0.05O2 cathode material
Source: Royal Society of Chemistry journal article supplement (doi:10.1039/c6ta08084g), 2016-11-28
Supplement: c6ta08084g1.pdf [file c6ta08084g1.pdf]

## Supporting Information

### **A new synthesis strategy towards enhancing the structure and cycle stabilities of $\text{LiNi}_{0.8}\text{Co}_{0.15}\text{Al}_{0.05}\text{O}_2$ cathode material**

H. Z. Zhang, C. Liu, D. W. Song\*, L. Q. Zhang\*, L. J. Bie

Tianjin Key Laboratory for Photoelectric Materials and Devices, School of Materials  
Science and Engineering, Tianjin University of Technology, Tianjin 300384, China

#### **Corresponding Author**

\*E-mail: [songdw2005@mail.nankai.edu.cn](mailto:songdw2005@mail.nankai.edu.cn) (D. W. Song)

\*E-mail: [tianjinzhanglq@163.com](mailto:tianjinzhanglq@163.com) (L. Q. Zhang)

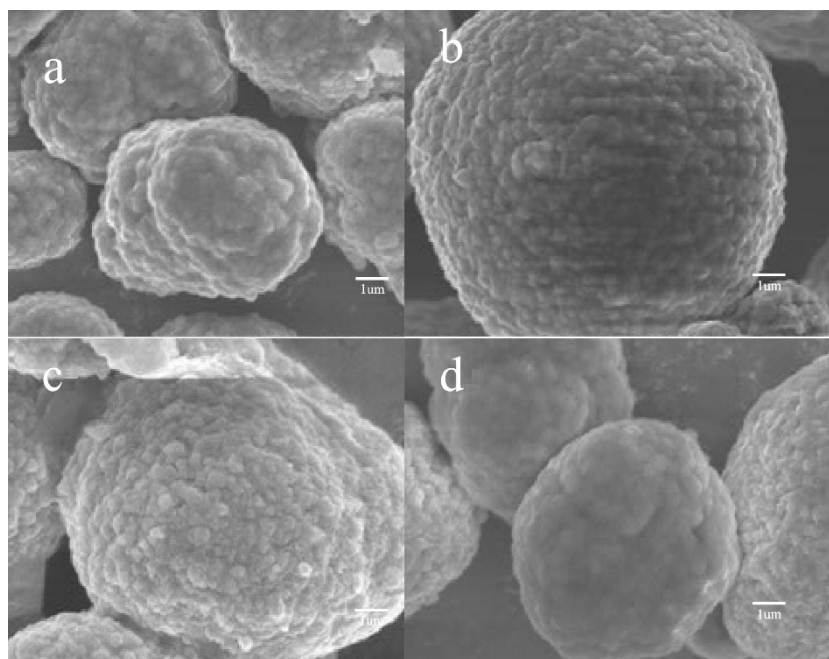

**Fig. S1** SEM images of LNCA powders. a, b, c and d are LNCA50, LNCA32, LNCA23 and LNCA05 respectively.

**Table S1.** The compositions of LNCA materials, determined by inductively coupled plasma test.

| Samples | Designed values                                            | Measured values                                                                 |
|---------|------------------------------------------------------------|---------------------------------------------------------------------------------|
| LNCA50  | LiNi <sub>0.80</sub> Co <sub>0.15</sub> Al <sub>0.05</sub> | Li <sub>0.999</sub> Ni <sub>0.802</sub> Co <sub>0.152</sub> Al <sub>0.045</sub> |
| LNCA32  | LiNi <sub>0.80</sub> Co <sub>0.15</sub> Al <sub>0.05</sub> | Li <sub>0.990</sub> Ni <sub>0.803</sub> Co <sub>0.149</sub> Al <sub>0.047</sub> |
| LNCA23  | LiNi <sub>0.80</sub> Co <sub>0.15</sub> Al <sub>0.05</sub> | Li <sub>0.985</sub> Ni <sub>0.801</sub> Co <sub>0.153</sub> Al <sub>0.047</sub> |
| LNCA05  | LiNi <sub>0.80</sub> Co <sub>0.15</sub> Al <sub>0.05</sub> | Li <sub>0.988</sub> Ni <sub>0.804</sub> Co <sub>0.149</sub> Al <sub>0.047</sub> |

**Table S2.** The atom parameters of LNCA32 samples synthesized at various temperatures. sg = space group, occ = site occupancy. The figures in parenthesis are the error value.

| sg:<br>R $\bar{3}$ m | LNCA32_650 |   |             |          | LNCA32_750 |   |             |          | LNCA32_850 |   |             |          |
|----------------------|------------|---|-------------|----------|------------|---|-------------|----------|------------|---|-------------|----------|
|                      | x          | y | z           | occ      | x          | y | z           | occ      | x          | y | z           | occ      |
| Li (3a)              | 0          | 0 | 0           | 0.978(2) | 0          | 0 | 0           | 0.989(2) | 0          | 0 | 0           | 0.975(4) |
| Li (3b)              | 0          | 0 | 0.5         | 0.022(2) | 0          | 0 | 0.5         | 0.011(2) | 0          | 0 | 0.5         | 0.025(4) |
| Ni (3a)              | 0          | 0 | 0           | 0.022(2) | 0          | 0 | 0           | 0.011(2) | 0          | 0 | 0           | 0.025(4) |
| Ni (3b)              | 0          | 0 | 0.5         | 0.778(2) | 0          | 0 | 0.5         | 0.789(2) | 0          | 0 | 0.5         | 0.775(4) |
| Co (3b)              | 0          | 0 | 0.5         | 0.1500   | 0          | 0 | 0.5         | 0.1500   | 0          | 0 | 0.5         | 0.1500   |
| Al (3b)              | 0          | 0 | 0.5         | 0.0500   | 0          | 0 | 0.5         | 0.0500   | 0          | 0 | 0.5         | 0.0500   |
| O (6c)               | 0          | 0 | 0.24327(21) | 1        | 0          | 0 | 0.24337(23) | 1        | 0          | 0 | 0.24328(23) | 1        |

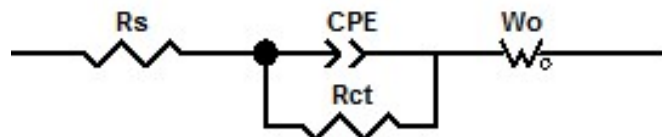

**Fig. S2** Equivalent circuits used to fit the experimental data.  $R_s$  is solution resistance,  $R_{ct}$  is interfacial charge-transfer resistance, CPE is a constant phase element,  $W_o$  is assigned to the semi-infinite Warburg diffusion impedance in the bulk.

**Table S3.** The simulated results from electrochemical impedance spectra of the LNCA electrodes.

| Sample  | $R_s$ ( $\Omega$ ) | $R_{ct}$ ( $\Omega$ ) |
|---------|--------------------|-----------------------|
| LNCA_50 | 1.82               | 154.8                 |
| LNCA_32 | 1.93               | 99.5                  |
| LNCA_23 | 2.59               | 130.1                 |
| LNCA_05 | 2.80               | 102.9                 |
